# Supplementary material for: Parallelization of the MAFFT multiple sequence alignment program
Source: PubMed Central journal article supplement — Bioinformatics. 2010 Apr 28;26(15):1899–900. doi: 10.1093/bioinformatics/btq224 (PMC2905546; doi:10.1093/bioinformatics/btq224), 2010-04-28
Supplement: btq224_1.pdf [file btq224_1.pdf]

| Pfam ID (# of sequences × # of sites)                     | # of threads | Elapsed time (sec.) |                  |                  | Total | Efficiency |
|-----------------------------------------------------------|--------------|---------------------|------------------|------------------|-------|------------|
|                                                           |              | (i) All-to-all      | (ii) Progressive | (iii) Refinement |       |            |
| <hr/>                                                     |              |                     |                  |                  |       |            |
| Cas_Cas1 (1000 × 640)                                     | 1            | 489                 | 16.7             | 3270             | 3770  | -          |
|                                                           | 2            | 248                 | 17.0             | 1760             | 2020  | 0.93       |
|                                                           | 8            | 67.8                | 15.4             | 654              | 737   | 0.64       |
| <hr/>                                                     |              |                     |                  |                  |       |            |
| Cob_adeno_trans (997 × 388)                               | 1            | 226                 | 9.94             | 2160             | 2390  | -          |
|                                                           | 2            | 115                 | 9.05             | 1190             | 1310  | 0.91       |
|                                                           | 8            | 31.8                | 9.59             | 466              | 507   | 0.59       |
| <hr/>                                                     |              |                     |                  |                  |       |            |
| CstA (1001 × 712)                                         | 1            | 639                 | 17.4             | 4010             | 4660  | -          |
|                                                           | 2            | 323                 | 15.3             | 2170             | 2510  | 0.93       |
|                                                           | 8            | 85.0                | 14.9             | 687              | 787   | 0.74       |
| <hr/>                                                     |              |                     |                  |                  |       |            |
| ArgJ (1001 × 747)                                         | 1            | 1050                | 20.9             | 6180             | 7250  | -          |
|                                                           | 2            | 540                 | 17.3             | 3360             | 3920  | 0.92       |
|                                                           | 8            | 139                 | 18.9             | 1480             | 1640  | 0.55       |
| <hr/>                                                     |              |                     |                  |                  |       |            |
| MHYT (1001 × 157)                                         | 1            | 44.7                | 4.36             | 628              | 677   | -          |
|                                                           | 2            | 23.5                | 4.39             | 368              | 396   | 0.85       |
|                                                           | 8            | 7.80                | 4.53             | 133              | 145   | 0.58       |
| <hr/>                                                     |              |                     |                  |                  |       |            |
| Average percentages of elapsed times for the three stages |              |                     |                  |                  |       |            |
|                                                           | 1            | 13%                 | 0.37%            | 87%              |       |            |
|                                                           | 2            | 12%                 | 0.62%            | 87%              |       |            |
|                                                           | 8            | 8.7%                | 1.7%             | 90%              |       |            |

**Supplemental table:** To examine the efficiency of the simple hill-climbing strategy for larger datasets than for those in the main part, elapsed time was measured for five datasets, each with ~1000 sequences, taken from Pfam (Finn *et al.* 2010). Elapsed times for stages i - iii are also separately shown to compare the parallelization efficiency in more detail. For the iterative refinement stage (iii), average elapsed time in ten runs with different random numbers is shown. The G-INS-i option of MAFFT was used in this test, because these Pfam alignments can be assumed to have global homology.

Finn, R. D., Mistry, J., Tate, J., Coggill, P., Heger, A., Pollington, J. E., Gavin, O. L., Gunasekaran, P., Ceric, G., Forslund, K., Holm, L., Sonnhammer, E. L., Eddy, S. R. & Bateman, A. (2010) The pfam protein families database. *Nucleic Acids Res.*, **38**, D211–D222.
